# Supplementary material
Source: publisher figshare collection journal article supplement (https://acs.figshare.com/ndownloader/files/4455712)
Supplement: Supplementary file 1 [file 4455712]

#\#CIF_1.1
 
#  CIF produced by WinGX routine CIF_UPDATE
#  Created on 2009-05-15 at 13:39:44
#  Using CIFtbx version 2.6.2 16 Jun 1998
 
#  Dictionary name : cif_core.dic
#  Dictionary vers : 2.3
#  Request file    : c:\program files\wingx\files\archive.dat
#  CIF files read  : lb190308
 
#
#     CCDC ELECTRONIC DATA DEPOSITION FORM (CIF)
#
#     This electronic data deposition form can be used:
#
#     (a) WHEN SUBMITTING A PAPER TO A JOURNAL FOR PUBLICATION or
#     (b) WHEN SUBMITTING A PRIVATE COMMUNICATION TO THE CCDC
#
#     A comprehensive archive of CIF resources is maintained by the IUCr
#     at its Chester office. This can be accessed
#     by anonymous ftp to ftp.iucr.org
#     or via the WWW at http://www.iucr.org/cif/home.html
#     If data items in this form are not available or not applicable
#     then ignore these items
#     A few items specific to CCDC input are indicated by _ccdc_
#
#     Submission and help information is provided at the end of this form
#-------------------------------------------------------------------------
#1    Global data block identification for start of deposition
 
data_global
 
#
#-------------------------------------------------------------------------
#2    Person making the deposition
#
_publ_contact_author               'Lugan, N.'
_publ_contact_author_email          noel.lugan@lcc-toulouse.fr
 
#-------------------------------------------------------------------------
#3    Publication details
#
#     Provide these details if the structure has been published,
#     accepted or submitted for publication
#
#     The CCDC journal deposition number, eg. 182/357,
#     should be included only if it has been assigned by the journal
#
loop_
_publ_author_name
 
'Lugan, N.'
 
_journal_name_full                 'private communication'
_journal_volume                    ?
_journal_page_first                ?
_journal_page_last                 ?
_journal_year                      ?
_ccdc_journal_depnumber            ?
#
#-------------------------------------------------------------------------
#4    Chemical and physical data
#
#     Note that the units for melting point are Kelvin
#     The compound_id is the identifier for the compound in the published
#       paper, eg. 4a, II, etc.
#     Provide a brief description of any significant biological activity,
#       eg. antimalarial activity
#     If the compound exhibits polymorphism provide brief details,
#       eg. monoclinic form, low-temperature phase, etc.
#     For chemdiag  leave blank - no longer necessary
 
_ccdc_compound_id                  ?
_ccdc_biological_activity          ?
_ccdc_polymorph                    ?
 
_ccdc_chemdiag_type                ?
_ccdc_chemdiag_records
;
?
;
#
#-------------------------------------------------------------------------
#5    Other data relating to the structure determination and refinement
#
#     Record the radiation type if not X-rays, eg. neutron
#     Record the temperature of the data collection (Kelvin)
#       if not room-temperature
#     Record R_squared if this is the only reliability factor given by
#       your refinement program
#     Describe briefly any disorder, eg. t-Butyl C31-33 disordered over
#       two sites with occupancies 0.6 and 0.4
#     Under ccdc_comments record any other important information
 
_ccdc_temp_data_collection          ?
_ccdc_ls_R_squared                  ?
_ccdc_disorder                      ?
_ccdc_comments
;
?
;
#-------------------------------------------------------------------------
#6    Include your "standard" CIF file here
#     It should contain the following data items:
#       unit cell parameters and volume, z value, space group symbol,
#       R-factor(s), atomic coordinates with standard deviations,
#       occupancy factors, bond lengths and bond angles
#     Other data items may be present but will not necessarily be
#       included in the Cambridge Structural Database
#
#     Do NOT include structure factors
#
#
#-------------------------------------------------------------------------
#SUBMISSION INFORMATION
#
#     For a journal send the form to the address specified by the journal
#
#     For a private communication to the CCDC send the form to the address
#       deposit@ccdc.cam.ac.uk
#
#     For up-to-date information on deposition procedures, check the website
#       http://www.ccdc.cam.ac.uk/
 
data_complex_7E2
 
_audit_creation_date                    2009-05-15T13:39:44-00:00
_audit_creation_method                  'WinGX routine CIF_UPDATE'
 
#----------------------------------------------------------------------------#
#                   CHEMICAL INFORMATION                                     #
#----------------------------------------------------------------------------#
 
_chemical_name_systematic
;
 ?
;
_chemical_formula_sum                   'C30 H38 Cl N2 O Rh'
_chemical_formula_moiety               'C30 H38 Cl N2 O Rh'
_chemical_formula_weight                580.98
_chemical_compound_source               'synthesis as described'
 
#----------------------------------------------------------------------------#
#                   UNIT CELL INFORMATION                                    #
#----------------------------------------------------------------------------#

_symmetry_cell_setting                  monoclinic
_symmetry_space_group_name_H-M          'P 21/n'
_symmetry_space_group_name_Hall         '-P 2yn'
_symmetry_Int_Tables_number             14

loop_
    _space_group_symop_operation_xyz
'x, y, z'
'-x+1/2, y+1/2, -z+1/2'
'-x, -y, -z'
'x-1/2, -y-1/2, z-1/2'
 
_cell_length_a                          13.200(5)
_cell_length_b                          11.630(5)
_cell_length_c                          18.518(5)
_cell_angle_alpha                       90
_cell_angle_beta                        100.288(5)
_cell_angle_gamma                       90
_cell_volume                            2797.1(18)
_cell_formula_units_Z                   4
_cell_measurement_temperature           180(2)
_cell_measurement_reflns_used           9999
_cell_measurement_theta_min             3.43
_cell_measurement_theta_max             36.58
_cell_measurement_wavelength            0.71073
 
#----------------------------------------------------------------------------#
#                   CRYSTAL INFORMATION                                      #
#----------------------------------------------------------------------------#
 
_exptl_crystal_description              block
_exptl_crystal_colour                   red
_exptl_crystal_size_max                 0.20
_exptl_crystal_size_mid                 0.15
_exptl_crystal_size_min                 0.15
_exptl_crystal_density_diffrn           1.38
_exptl_crystal_density_method           'not measured'
_exptl_crystal_F_000                    1208
_exptl_special_details
;
 ?
;
 
#----------------------------------------------------------------------------#
#                   ABSORPTION CORRECTION                                    #
#----------------------------------------------------------------------------#
 
_exptl_absorpt_coefficient_mu           0.731
_exptl_absorpt_correction_type          multi-scan
_exptl_absorpt_process_details
;
 R.H. Blessing, Acta Cryst. (1995), A51, 33-38
;
_exptl_absorpt_correction_T_min         0.662  
_exptl_absorpt_correction_T_max         0.746
 
#----------------------------------------------------------------------------#
#                   DATA COLLECTION                                          #
#----------------------------------------------------------------------------#
 
_diffrn_ambient_temperature             180(2)
_diffrn_radiation_wavelength            0.71073
_diffrn_radiation_type                  MoK\a
_diffrn_radiation_monochromator         graphite
_diffrn_radiation_probe                 x-ray
_diffrn_measurement_device_type         'Bruker D8 Apex II'
_diffrn_measurement_method              \f
_diffrn_reflns_av_R_equivalents         0.0453
_diffrn_reflns_av_unetI/netI            0.0217
_diffrn_standards_number          0
_diffrn_standards_interval_count    0
_diffrn_standards_decay_%         0
_diffrn_reflns_number                   78899
_diffrn_reflns_limit_h_min              -16
_diffrn_reflns_limit_h_max              16
_diffrn_reflns_limit_k_min              -14
_diffrn_reflns_limit_k_max              14
_diffrn_reflns_limit_l_min              -23
_diffrn_reflns_limit_l_max              23
_diffrn_reflns_theta_min                3.43
_diffrn_reflns_theta_max                26.37
_reflns_number_total                    5689
_reflns_number_gt                       4471
_reflns_threshold_expression            >2sigma(I)
_diffrn_measured_fraction_theta_max    0.994
_diffrn_reflns_theta_full              26.37
_diffrn_measured_fraction_theta_full   0.994

 
#----------------------------------------------------------------------------#
#                   COMPUTER PROGRAMS USED                                   #
#----------------------------------------------------------------------------#
 
_computing_structure_refinement         'SHELXL-97 (Sheldrick, 1997)'
 
#----------------------------------------------------------------------------#
#                   REFINEMENT INFORMATION                                   #
#----------------------------------------------------------------------------#
 
_refine_special_details
;
 Refinement of F^2^ against ALL reflections.  The weighted R-factor wR and
 goodness of fit S are based on F^2^, conventional R-factors R are based
 on F, with F set to zero for negative F^2^. The threshold expression of
 F^2^ > 2sigma(F^2^) is used only for calculating R-factors(gt) etc. and is
 not relevant to the choice of reflections for refinement.  R-factors based
 on F^2^ are statistically about twice as large as those based on F, and R-
 factors based on ALL data will be even larger.
;
_refine_ls_structure_factor_coef  Fsqd
_refine_ls_matrix_type            full
_refine_ls_weighting_scheme       calc
_refine_ls_weighting_details
 'calc w=1/[\s^2^(Fo^2^)+(0.0260P)^2^+4.9636P] where P=(Fo^2^+2Fc^2^)/3'
_atom_sites_solution_primary      direct
_atom_sites_solution_secondary    difmap
_atom_sites_solution_hydrogens    geom
_refine_ls_hydrogen_treatment     riding
_refine_ls_extinction_method      none
_refine_ls_extinction_coef        ?
_refine_ls_number_reflns          5689
_refine_ls_number_parameters      361
_refine_ls_number_restraints      0
_refine_ls_R_factor_all           0.0623
_refine_ls_R_factor_gt            0.0385
_refine_ls_wR_factor_ref          0.1028
_refine_ls_wR_factor_gt           0.0833
_refine_ls_goodness_of_fit_ref    1.210
_refine_ls_restrained_S_all       1.210
_refine_ls_shift/su_max           0.001
_refine_ls_shift/su_mean          0.000
_refine_diff_density_max    0.874
_refine_diff_density_min   -0.533
_refine_diff_density_rms    0.078
 
#----------------------------------------------------------------------------#
#                   ATOMIC TYPES, COORDINATES AND THERMAL PARAMETERS         #
#----------------------------------------------------------------------------#
 
loop_
    _atom_type_symbol
    _atom_type_description
    _atom_type_scat_dispersion_real
    _atom_type_scat_dispersion_imag
    _atom_type_scat_source
C C 0.0033 0.0016 'International Tables Vol C Tables 4.2.6.8 and 6.1.1.4'
H H 0 0 'International Tables Vol C Tables 4.2.6.8 and 6.1.1.4'
N N 0.0061 0.0033 'International Tables Vol C Tables 4.2.6.8 and 6.1.1.4'
O O 0.0106 0.006 'International Tables Vol C Tables 4.2.6.8 and 6.1.1.4'
Cl Cl 0.1484 0.1585 'International Tables Vol C Tables 4.2.6.8 and 6.1.1.4'
Rh Rh -1.1178 0.9187 'International Tables Vol C Tables 4.2.6.8 and 6.1.1.4'
 
loop_
 _atom_site_label
 _atom_site_type_symbol
 _atom_site_fract_x
 _atom_site_fract_y
 _atom_site_fract_z
 _atom_site_U_iso_or_equiv
 _atom_site_adp_type
 _atom_site_occupancy
 _atom_site_symmetry_multiplicity
 _atom_site_calc_flag
 _atom_site_refinement_flags
 _atom_site_disorder_assembly
 _atom_site_disorder_group
C4A C 0.6127(5) 0.7245(8) 0.2471(4) 0.082(3) Uani 0.680(6) 1 d P A 1
H4A H 0.6059 0.7894 0.2146 0.123 Uiso 0.680(6) 1 calc PR A 1
H4B H 0.5530 0.7192 0.2699 0.123 Uiso 0.680(6) 1 calc PR A 1
H4C H 0.6190 0.6555 0.2197 0.123 Uiso 0.680(6) 1 calc PR A 1
O1A O 0.7012(3) 0.7380(5) 0.3015(2) 0.0624(15) Uani 0.680(6) 1 d P A 1
C4B C 0.6371(10) 0.7260(14) 0.1594(9) 0.068(5) Uani 0.320(6) 1 d P A 2
H4B1 H 0.6234 0.6529 0.1798 0.103 Uiso 0.320(6) 1 calc PR A 2
H4B2 H 0.5970 0.7332 0.1110 0.103 Uiso 0.320(6) 1 calc PR A 2
H4B3 H 0.6189 0.7865 0.1900 0.103 Uiso 0.320(6) 1 calc PR A 2
O1B O 0.7451(7) 0.7342(9) 0.1557(5) 0.059(3) Uani 0.320(6) 1 d P A 2
C1 C 0.9612(3) 0.7650(3) 0.2933(2) 0.0365(8) Uani 1 1 d . B 3
C2 C 0.7872(3) 0.7448(4) 0.2789(3) 0.0525(10) Uani 1 1 d . B 3
H2 H 0.7218 0.7383 0.2906 0.063 Uiso 0.320(6) 1 calc PR B 3
C3 C 0.8094(3) 0.7443(4) 0.2117(2) 0.0524(10) Uani 1 1 d . B 3
H3 H 0.7634 0.7375 0.1676 0.063 Uiso 0.680(6) 1 calc PR A 3
C21 C 0.8830(3) 0.7448(3) 0.4068(2) 0.0423(8) Uani 1 1 d . B 3
C22 C 0.8846(3) 0.8411(3) 0.4510(2) 0.0454(9) Uani 1 1 d . B 3
C23 C 0.8831(3) 0.8245(4) 0.5248(2) 0.0517(10) Uani 1 1 d . B 3
H23 H 0.8871 0.8882 0.5555 0.062 Uiso 1 1 calc R B 3
C24 C 0.8758(3) 0.7162(4) 0.5542(2) 0.0541(10) Uani 1 1 d . B 3
C25 C 0.8739(3) 0.6224(4) 0.5082(2) 0.0543(10) Uani 1 1 d . B 3
H25 H 0.8704 0.5491 0.5276 0.065 Uiso 1 1 calc R B 3
C26 C 0.8772(3) 0.6339(3) 0.4337(2) 0.0457(9) Uani 1 1 d . B 3
C27 C 0.8849(4) 0.9602(4) 0.4194(3) 0.0694(13) Uani 1 1 d . B 3
H27A H 0.9415 0.9677 0.3937 0.104 Uiso 1 1 calc R B 3
H27B H 0.8918 1.0157 0.4584 0.104 Uiso 1 1 calc R B 3
H27C H 0.8214 0.9733 0.3860 0.104 Uiso 1 1 calc R B 3
C28 C 0.8639(4) 0.7013(5) 0.6330(3) 0.0733(14) Uani 1 1 d . B 3
H28A H 0.7927 0.6884 0.6353 0.110 Uiso 1 1 calc R B 3
H28B H 0.8874 0.7694 0.6602 0.110 Uiso 1 1 calc R B 3
H28C H 0.9040 0.6366 0.6538 0.110 Uiso 1 1 calc R B 3
C29 C 0.8754(4) 0.5295(4) 0.3856(3) 0.0626(12) Uani 1 1 d . B 3
H29A H 0.8095 0.5237 0.3541 0.094 Uiso 1 1 calc R B 3
H29B H 0.8874 0.4619 0.4157 0.094 Uiso 1 1 calc R B 3
H29C H 0.9282 0.5362 0.3563 0.094 Uiso 1 1 calc R B 3
C31 C 0.9689(3) 0.7471(4) 0.1597(2) 0.0458(9) Uani 1 1 d . B 3
C32 C 1.0040(4) 0.6394(4) 0.1422(2) 0.0604(12) Uani 1 1 d . B 3
C33 C 1.0511(4) 0.6312(5) 0.0812(3) 0.0734(15) Uani 1 1 d . B 3
H33 H 1.0750 0.5598 0.0690 0.088 Uiso 1 1 calc R B 3
C34 C 1.0637(3) 0.7246(6) 0.0378(3) 0.0718(15) Uani 1 1 d . B 3
C35 C 1.0262(4) 0.8285(5) 0.0563(2) 0.0661(13) Uani 1 1 d . B 3
H35 H 1.0347 0.8922 0.0276 0.079 Uiso 1 1 calc R B 3
C36 C 0.9763(3) 0.8432(4) 0.1156(2) 0.0521(10) Uani 1 1 d . B 3
C37 C 0.9825(5) 0.5326(4) 0.1836(3) 0.093(2) Uani 1 1 d . B 3
H37A H 0.9729 0.5535 0.2320 0.140 Uiso 1 1 calc R B 3
H37B H 1.0396 0.4806 0.1869 0.140 Uiso 1 1 calc R B 3
H37C H 0.9213 0.4959 0.1580 0.140 Uiso 1 1 calc R B 3
C38 C 1.1117(4) 0.7121(7) -0.0299(3) 0.105(2) Uani 1 1 d . B 3
H38A H 1.1443 0.6383 -0.0295 0.158 Uiso 1 1 calc R B 3
H38B H 1.1621 0.7715 -0.0304 0.158 Uiso 1 1 calc R B 3
H38C H 1.0592 0.7186 -0.0729 0.158 Uiso 1 1 calc R B 3
C39 C 0.9287(4) 0.9565(4) 0.1281(3) 0.0682(13) Uani 1 1 d . B 3
H39A H 0.9813 1.0142 0.1375 0.102 Uiso 1 1 calc R B 3
H39B H 0.8944 0.9507 0.1695 0.102 Uiso 1 1 calc R B 3
H39C H 0.8797 0.9772 0.0853 0.102 Uiso 1 1 calc R B 3
N1 N 0.8787(2) 0.7565(3) 0.32868(17) 0.0413(7) Uani 1 1 d . B 3
N2 N 0.9165(2) 0.7562(3) 0.22115(17) 0.0421(7) Uani 1 1 d . B 3
Cl1 Cl 1.07173(9) 0.99770(9) 0.29470(7) 0.0627(3) Uani 1 1 d . C 3
Rh1 Rh 1.11064(2) 0.80701(2) 0.334683(15) 0.03705(10) Uani 1 1 d . A 4
C5 C 1.1379(3) 0.6765(4) 0.4139(3) 0.0597(12) Uani 1 1 d . A 4
H5 H 1.0771 0.6446 0.4302 0.072 Uiso 0.680(6) 1 calc PR A 4
C6 C 1.1589(3) 0.6351(4) 0.3489(3) 0.0667(13) Uani 1 1 d . A 4
H6 H 1.1042 0.5830 0.3259 0.080 Uiso 0.680(6) 1 calc PR A 4
C7A C 1.2568(7) 0.6149(9) 0.3179(7) 0.093(3) Uani 0.680(6) 1 d P A 4
H7A1 H 1.2390 0.5999 0.2656 0.111 Uiso 0.680(6) 1 calc PR A 4
H7A2 H 1.2924 0.5479 0.3412 0.111 Uiso 0.680(6) 1 calc PR A 4
C8 C 1.3279(4) 0.7196(6) 0.3310(4) 0.0889(19) Uani 1 1 d . A 4
H8A H 1.3773 0.7071 0.3758 0.107 Uiso 0.680(6) 1 calc PR A 4
H8B H 1.3661 0.7248 0.2910 0.107 Uiso 0.680(6) 1 calc PR A 4
C9 C 1.2754(3) 0.8318(5) 0.3372(3) 0.0632(13) Uani 1 1 d . A 4
H9 H 1.2916 0.8910 0.3034 0.076 Uiso 1 1 calc R A 4
C10 C 1.2532(3) 0.8738(4) 0.4007(3) 0.0567(11) Uani 1 1 d . A 4
H10 H 1.2558 0.9579 0.4041 0.068 Uiso 1 1 calc R A 4
C11 C 1.2744(4) 0.8140(5) 0.4737(3) 0.0696(14) Uani 1 1 d . A 4
H11A H 1.3484 0.8080 0.4895 0.084 Uiso 0.680(6) 1 calc PR A 4
H11B H 1.2478 0.8608 0.5094 0.084 Uiso 0.680(6) 1 calc PR A 4
C12A C 1.2300(7) 0.7002(10) 0.4733(5) 0.080(3) Uani 0.680(6) 1 d P A 4
H12A H 1.2098 0.6873 0.5205 0.096 Uiso 0.680(6) 1 calc PR A 4
H12B H 1.2831 0.6445 0.4685 0.096 Uiso 0.680(6) 1 calc PR A 4
H5B H 1.0704 0.6458 0.4189 0.072 Uiso 0.320(6) 1 calc PR A 5
H6B H 1.1171 0.5732 0.3229 0.080 Uiso 0.320(6) 1 calc PR A 5
H8B1 H 1.3269 0.7036 0.2795 0.107 Uiso 0.320(6) 1 calc PR A 5
H8B2 H 1.3994 0.7267 0.3547 0.107 Uiso 0.320(6) 1 calc PR A 5
H11C H 1.2847 0.8721 0.5119 0.084 Uiso 0.320(6) 1 calc PR A 5
H11D H 1.3386 0.7720 0.4771 0.084 Uiso 0.320(6) 1 calc PR A 5
C7B C 1.2861(12) 0.6294(16) 0.3609(9) 0.055(4) Uani 0.320(6) 1 d P A 5
H7B1 H 1.3136 0.6268 0.4130 0.066 Uiso 0.320(6) 1 calc PR A 5
H7B2 H 1.3062 0.5590 0.3391 0.066 Uiso 0.320(6) 1 calc PR A 5
C12B C 1.1870(12) 0.7254(16) 0.4908(7) 0.060(5) Uani 0.320(6) 1 d P A 5
H12C H 1.2174 0.6643 0.5233 0.072 Uiso 0.320(6) 1 calc PR A 5
H12D H 1.1359 0.7650 0.5133 0.072 Uiso 0.320(6) 1 calc PR A 5
 
loop_
 _atom_site_aniso_label
 _atom_site_aniso_U_11
 _atom_site_aniso_U_22
 _atom_site_aniso_U_33
 _atom_site_aniso_U_23
 _atom_site_aniso_U_13
 _atom_site_aniso_U_12
C4A 0.033(3) 0.128(8) 0.082(5) -0.001(5) 0.004(3) -0.015(4)
O1A 0.034(2) 0.100(4) 0.054(3) 0.000(2) 0.0108(19) -0.009(2)
C4B 0.040(7) 0.068(10) 0.087(11) -0.019(8) -0.017(7) 0.001(7)
O1B 0.050(5) 0.087(7) 0.036(5) -0.013(4) -0.005(4) 0.003(5)
C1 0.0377(18) 0.0272(17) 0.0433(19) 0.0036(14) 0.0039(15) -0.0020(14)
C2 0.034(2) 0.055(3) 0.066(3) -0.001(2) -0.0007(19) -0.0067(18)
C3 0.041(2) 0.056(3) 0.053(3) -0.002(2) -0.0095(19) -0.0052(19)
C21 0.0347(19) 0.042(2) 0.052(2) 0.0018(17) 0.0112(16) -0.0031(16)
C22 0.039(2) 0.040(2) 0.058(2) -0.0027(18) 0.0109(18) -0.0044(16)
C23 0.050(2) 0.049(2) 0.057(2) -0.0079(19) 0.0090(19) -0.0083(19)
C24 0.047(2) 0.062(3) 0.052(2) -0.001(2) 0.0065(19) -0.009(2)
C25 0.059(3) 0.043(2) 0.061(3) 0.006(2) 0.011(2) -0.0052(19)
C26 0.039(2) 0.042(2) 0.057(2) -0.0025(18) 0.0109(17) -0.0055(17)
C27 0.087(4) 0.042(2) 0.084(3) -0.003(2) 0.028(3) -0.004(2)
C28 0.086(4) 0.082(4) 0.051(3) 0.004(3) 0.010(2) -0.012(3)
C29 0.077(3) 0.038(2) 0.077(3) -0.003(2) 0.027(3) -0.008(2)
C31 0.044(2) 0.052(2) 0.038(2) -0.0036(18) -0.0025(16) 0.0032(18)
C32 0.066(3) 0.061(3) 0.048(2) -0.010(2) -0.005(2) 0.015(2)
C33 0.058(3) 0.095(4) 0.060(3) -0.022(3) -0.008(2) 0.032(3)
C34 0.039(2) 0.121(5) 0.052(3) -0.015(3) -0.001(2) 0.006(3)
C35 0.062(3) 0.088(4) 0.046(2) -0.001(2) 0.007(2) -0.019(3)
C36 0.049(2) 0.058(3) 0.046(2) -0.0023(19) 0.0002(18) -0.0044(19)
C37 0.149(6) 0.047(3) 0.077(4) 0.001(3) 0.004(4) 0.027(3)
C38 0.059(3) 0.187(8) 0.071(4) -0.028(4) 0.017(3) 0.005(4)
C39 0.094(4) 0.052(3) 0.055(3) 0.008(2) 0.006(3) 0.000(3)
N1 0.0341(16) 0.0410(17) 0.0480(18) -0.0046(14) 0.0054(13) -0.0044(13)
N2 0.0411(17) 0.0416(18) 0.0408(17) -0.0008(14) -0.0002(14) -0.0013(14)
Cl1 0.0693(7) 0.0402(6) 0.0726(7) 0.0139(5) -0.0039(6) -0.0090(5)
Rh1 0.03287(15) 0.03765(16) 0.03953(16) 0.00266(13) 0.00346(11) -0.00463(12)
C5 0.042(2) 0.056(3) 0.077(3) 0.030(2) -0.002(2) -0.0072(19)
C6 0.047(2) 0.040(2) 0.111(4) -0.010(3) 0.007(3) 0.001(2)
C7A 0.060(6) 0.087(7) 0.130(10) -0.033(7) 0.013(6) 0.010(5)
C8 0.048(3) 0.130(6) 0.095(4) -0.014(4) 0.032(3) 0.010(3)
C9 0.037(2) 0.084(4) 0.071(3) 0.015(3) 0.016(2) -0.018(2)
C10 0.036(2) 0.047(2) 0.081(3) 0.000(2) -0.006(2) -0.0131(18)
C11 0.054(3) 0.092(4) 0.056(3) -0.013(3) -0.009(2) 0.003(3)
C12A 0.053(5) 0.116(8) 0.067(6) 0.042(6) 0.003(4) -0.010(5)
C7B 0.037(8) 0.071(11) 0.057(9) -0.014(8) 0.009(7) 0.030(8)
C12B 0.042(8) 0.114(13) 0.019(6) -0.005(6) -0.008(5) 0.057(9)
 
_geom_special_details
;
 All esds (except the esd in the dihedral angle between two l.s. planes)
 are estimated using the full covariance matrix.  The cell esds are taken
 into account individually in the estimation of esds in distances, angles
 and torsion angles; correlations between esds in cell parameters are only
 used when they are defined by crystal symmetry.  An approximate (isotropic)
 treatment of cell esds is used for estimating esds involving l.s. planes.
;
 
loop_
 _geom_bond_atom_site_label_1
 _geom_bond_atom_site_label_2
 _geom_bond_distance
 _geom_bond_site_symmetry_2
 _geom_bond_publ_flag
C4A O1A 1.408(8) . ?
C4A H4A 0.9600 . ?
C4A H4B 0.9600 . ?
C4A H4C 0.9600 . ?
C4B O1B 1.442(16) . ?
C4B H4B1 0.9600 . ?
C4B H4B2 0.9600 . ?
C4B H4B3 0.9600 . ?
C1 N2 1.365(5) . ?
C1 N1 1.371(5) . ?
C2 C3 1.330(6) . ?
C2 N1 1.389(5) . ?
C2 H2 0.9300 . ?
C3 N2 1.401(5) . ?
C3 H3 0.9300 . ?
C21 C22 1.385(5) . ?
C21 C26 1.390(5) . ?
C21 N1 1.443(5) . ?
C22 C23 1.383(6) . ?
C22 C27 1.504(6) . ?
C23 C24 1.382(6) . ?
C23 H23 0.9300 . ?
C24 C25 1.381(6) . ?
C24 C28 1.506(6) . ?
C25 C26 1.393(6) . ?
C25 H25 0.9300 . ?
C26 C29 1.504(6) . ?
C27 H27A 0.9600 . ?
C27 H27B 0.9600 . ?
C27 H27C 0.9600 . ?
C28 H28A 0.9600 . ?
C28 H28B 0.9600 . ?
C28 H28C 0.9600 . ?
C29 H29A 0.9600 . ?
C29 H29B 0.9600 . ?
C29 H29C 0.9600 . ?
C31 C32 1.394(6) . ?
C31 C36 1.397(6) . ?
C31 N2 1.438(5) . ?
C32 C33 1.387(7) . ?
C32 C37 1.512(7) . ?
C33 C34 1.379(8) . ?
C33 H33 0.9300 . ?
C34 C35 1.371(8) . ?
C34 C38 1.509(7) . ?
C35 C36 1.390(6) . ?
C35 H35 0.9300 . ?
C36 C39 1.496(6) . ?
C37 H37A 0.9600 . ?
C37 H37B 0.9600 . ?
C37 H37C 0.9600 . ?
C38 H38A 0.9600 . ?
C38 H38B 0.9600 . ?
C38 H38C 0.9600 . ?
C39 H39A 0.9600 . ?
C39 H39B 0.9600 . ?
C39 H39C 0.9600 . ?
Rh1 C5 2.097(4) . ?
Rh1 C6 2.101(5) . ?
Rh1 C9 2.186(4) . ?
Rh1 C10 2.195(4) . ?
C5 C6 1.371(7) . ?
C5 C12A 1.511(9) . ?
C5 H5 0.9800 . ?
C6 C7A 1.523(11) . ?
C6 H6 0.9800 . ?
C7A C8 1.531(12) . ?
C7A H7A1 0.9700 . ?
C7A H7A2 0.9700 . ?
C8 C9 1.491(8) . ?
C8 H8A 0.9700 . ?
C8 H8B 0.9700 . ?
C9 C10 1.353(7) . ?
C9 H9 0.9800 . ?
C10 C11 1.502(7) . ?
C10 H10 0.9800 . ?
C11 C12A 1.447(11) . ?
C11 H11A 0.9700 . ?
C11 H11B 0.9700 . ?
C12A H12A 0.9700 . ?
C12A H12B 0.9700 . ?
C7B H7B1 0.9700 . ?
C7B H7B2 0.9700 . ?
C12B H12C 0.9700 . ?
C12B H12D 0.9700 . ?
 
loop_
 _geom_angle_atom_site_label_1
 _geom_angle_atom_site_label_2
 _geom_angle_atom_site_label_3
 _geom_angle
 _geom_angle_site_symmetry_1
 _geom_angle_site_symmetry_3
 _geom_angle_publ_flag
O1B C4B H4B1 109.5 . . ?
O1B C4B H4B2 109.5 . . ?
H4B1 C4B H4B2 109.5 . . ?
O1B C4B H4B3 109.5 . . ?
H4B1 C4B H4B3 109.5 . . ?
H4B2 C4B H4B3 109.5 . . ?
N2 C1 N1 102.8(3) . . ?
C3 C2 N1 108.1(4) . . ?
C3 C2 H2 126.0 . . ?
N1 C2 H2 126.0 . . ?
C2 C3 N2 105.6(3) . . ?
C2 C3 H3 127.2 . . ?
N2 C3 H3 127.2 . . ?
C22 C21 C26 122.2(4) . . ?
C22 C21 N1 120.7(3) . . ?
C26 C21 N1 116.9(3) . . ?
C23 C22 C21 118.0(4) . . ?
C23 C22 C27 120.9(4) . . ?
C21 C22 C27 121.0(4) . . ?
C24 C23 C22 122.0(4) . . ?
C24 C23 H23 119.0 . . ?
C22 C23 H23 119.0 . . ?
C25 C24 C23 118.1(4) . . ?
C25 C24 C28 120.9(4) . . ?
C23 C24 C28 120.9(4) . . ?
C24 C25 C26 122.3(4) . . ?
C24 C25 H25 118.9 . . ?
C26 C25 H25 118.9 . . ?
C21 C26 C25 117.2(4) . . ?
C21 C26 C29 122.2(4) . . ?
C25 C26 C29 120.6(4) . . ?
C32 C31 C36 121.5(4) . . ?
C32 C31 N2 118.5(4) . . ?
C36 C31 N2 119.8(4) . . ?
C33 C32 C31 117.8(5) . . ?
C33 C32 C37 120.6(5) . . ?
C31 C32 C37 121.3(4) . . ?
C34 C33 C32 122.6(5) . . ?
C34 C33 H33 118.7 . . ?
C32 C33 H33 118.7 . . ?
C35 C34 C33 117.5(5) . . ?
C35 C34 C38 121.0(6) . . ?
C33 C34 C38 121.3(6) . . ?
C34 C35 C36 123.3(5) . . ?
C34 C35 H35 118.4 . . ?
C36 C35 H35 118.4 . . ?
C35 C36 C31 117.1(4) . . ?
C35 C36 C39 120.2(4) . . ?
C31 C36 C39 122.6(4) . . ?
C1 N1 C2 111.2(3) . . ?
C1 N1 C21 126.4(3) . . ?
C2 N1 C21 121.9(3) . . ?
C1 N2 C3 112.3(3) . . ?
C1 N2 C31 126.6(3) . . ?
C3 N2 C31 120.7(3) . . ?
C5 Rh1 C6 38.11(19) . . ?
C5 Rh1 C9 91.96(17) . . ?
C6 Rh1 C9 81.06(19) . . ?
C5 Rh1 C10 80.98(17) . . ?
C6 Rh1 C10 93.24(18) . . ?
C9 Rh1 C10 35.98(17) . . ?
C6 C5 C12A 116.1(6) . . ?
C6 C5 Rh1 71.1(3) . . ?
C12A C5 Rh1 113.1(4) . . ?
C6 C5 H5 116.2 . . ?
C12A C5 H5 116.2 . . ?
Rh1 C5 H5 116.2 . . ?
C5 C6 C7A 134.7(6) . . ?
C5 C6 Rh1 70.8(3) . . ?
C7A C6 Rh1 111.0(5) . . ?
C5 C6 H6 110.5 . . ?
C7A C6 H6 110.5 . . ?
Rh1 C6 H6 110.5 . . ?
C6 C7A C8 110.8(7) . . ?
C6 C7A H7A1 109.5 . . ?
C8 C7A H7A1 109.5 . . ?
C6 C7A H7A2 109.5 . . ?
C8 C7A H7A2 109.5 . . ?
H7A1 C7A H7A2 108.1 . . ?
C9 C8 C7A 115.4(5) . . ?
C9 C8 H8A 108.4 . . ?
C7A C8 H8A 108.4 . . ?
C9 C8 H8B 108.4 . . ?
C7A C8 H8B 108.4 . . ?
H8A C8 H8B 107.5 . . ?
C10 C9 C8 124.0(5) . . ?
C10 C9 Rh1 72.4(2) . . ?
C8 C9 Rh1 110.9(3) . . ?
C10 C9 H9 114.1 . . ?
C8 C9 H9 114.1 . . ?
Rh1 C9 H9 114.1 . . ?
C9 C10 C11 125.4(4) . . ?
C9 C10 Rh1 71.7(2) . . ?
C11 C10 Rh1 110.0(3) . . ?
C9 C10 H10 113.9 . . ?
C11 C10 H10 113.9 . . ?
Rh1 C10 H10 113.9 . . ?
C12A C11 C10 114.1(5) . . ?
C12A C11 H11A 108.7 . . ?
C10 C11 H11A 108.7 . . ?
C12A C11 H11B 108.7 . . ?
C10 C11 H11B 108.7 . . ?
H11A C11 H11B 107.6 . . ?
C11 C12A C5 116.3(6) . . ?
C11 C12A H12A 108.2 . . ?
C5 C12A H12A 108.2 . . ?
C11 C12A H12B 108.2 . . ?
C5 C12A H12B 108.2 . . ?
H12A C12A H12B 107.4 . . ?
H7B1 C7B H7B2 107.7 . . ?
H12C C12B H12D 108.9 . . ?

data_complex_7E4
  
_audit_creation_method            SHELXL-97 
_chemical_name_systematic 
; 
 ? 
; 
_chemical_name_common             ? 
_chemical_melting_point           ? 
_chemical_formula_sum  'C41 H45 Cl N2 O2 P Rh' 
_chemical_formula_moiety  'C41 H45 Cl N2 O2 P Rh' 
_chemical_formula_weight          767.12 
  
loop_ 
 _atom_type_symbol 
 _atom_type_description 
 _atom_type_scat_dispersion_real 
 _atom_type_scat_dispersion_imag 
 _atom_type_scat_source 
 'C'  'C'   0.0033   0.0016 
 'International Tables Vol C Tables 4.2.6.8 and 6.1.1.4' 
 'H'  'H'   0.0000   0.0000 
 'International Tables Vol C Tables 4.2.6.8 and 6.1.1.4' 
 'N'  'N'   0.0061   0.0033 
 'International Tables Vol C Tables 4.2.6.8 and 6.1.1.4' 
 'O'  'O'   0.0106   0.0060 
 'International Tables Vol C Tables 4.2.6.8 and 6.1.1.4' 
 'Rh'  'Rh'  -1.1178   0.9187 
 'International Tables Vol C Tables 4.2.6.8 and 6.1.1.4' 
 'P'  'P'   0.1023   0.0942 
 'International Tables Vol C Tables 4.2.6.8 and 6.1.1.4' 
 'Cl'  'Cl'   0.1484   0.1585 
 'International Tables Vol C Tables 4.2.6.8 and 6.1.1.4' 
  
_symmetry_cell_setting            Monoclinic 
_symmetry_space_group_name_H-M    P2(1)/n 
_symmetry_space_group_name_Hall         '-P 2yn'
  
loop_ 
 _symmetry_equiv_pos_as_xyz 
 'x, y, z' 
 '-x+1/2, y+1/2, -z+1/2' 
 '-x, -y, -z' 
 'x-1/2, -y-1/2, z-1/2' 
  
_cell_length_a                    18.6377(5) 
_cell_length_b                    11.2954(4) 
_cell_length_c                    19.2758(6) 
_cell_angle_alpha                 90.00 
_cell_angle_beta                  107.192(2) 
_cell_angle_gamma                 90.00 
_cell_volume                      3876.6(2) 
_cell_formula_units_Z             4 
_cell_measurement_temperature     110(2) 
_cell_measurement_reflns_used     9888 
_cell_measurement_theta_min       2.24 
_cell_measurement_theta_max       24.09 
  
_exptl_crystal_description        plate 
_exptl_crystal_colour             yellow 
_exptl_crystal_size_max           0.40 
_exptl_crystal_size_mid           0.30 
_exptl_crystal_size_min           0.10 
_exptl_crystal_density_meas       ? 
_exptl_crystal_density_diffrn     1.314 
_exptl_crystal_density_method     'not measured' 
_exptl_crystal_F_000              1592 
_exptl_absorpt_coefficient_mu     0.586 
_exptl_absorpt_correction_type    multi-scans 
_exptl_absorpt_correction_T_min   0.7993 
_exptl_absorpt_correction_T_max   0.9437 
_exptl_absorpt_process_details    'SADABS (Bruker-AXS)' 
  
_exptl_special_details 
; 
 ? 
; 
  
_diffrn_ambient_temperature       110(2) 
_diffrn_radiation_wavelength      0.71073 
_diffrn_radiation_type            MoK\a 
_diffrn_radiation_source          'fine-focus sealed tube' 
_diffrn_radiation_monochromator   graphite 
_diffrn_measurement_device_type   'CCD area detector' 
_diffrn_measurement_method        'phi and omega scans' 
_diffrn_detector_area_resol_mean  ? 
_diffrn_standards_number          ? 
_diffrn_standards_interval_count  ? 
_diffrn_standards_interval_time   ? 
_diffrn_standards_decay_%         ? 
_diffrn_reflns_number             68541 
_diffrn_reflns_av_R_equivalents   0.0624 
_diffrn_reflns_av_sigmaI/netI     0.0327 
_diffrn_reflns_limit_h_min        -21 
_diffrn_reflns_limit_h_max        21 
_diffrn_reflns_limit_k_min        -13 
_diffrn_reflns_limit_k_max        13 
_diffrn_reflns_limit_l_min        -22 
_diffrn_reflns_limit_l_max        22 
_diffrn_reflns_theta_min          2.12 
_diffrn_reflns_theta_max          24.51 
_reflns_number_total              6446 
_reflns_number_gt                 4989 
_reflns_threshold_expression      >2sigma(I) 
  
_computing_data_collection        'Bruker SMART' 
_computing_cell_refinement        'Bruker SMART' 
_computing_data_reduction         'Bruker SAINT' 
_computing_structure_solution     'SHELXS-97 (Sheldrick, 1990)' 
_computing_structure_refinement   'SHELXL-97 (Sheldrick, 1997)' 
_computing_molecular_graphics     'Bruker SHELXTL' 
_computing_publication_material   'Bruker SHELXTL' 
  
_refine_special_details 
; 
 Refinement of F^2^ against ALL reflections.  The weighted R-factor wR and 
 goodness of fit S are based on F^2^, conventional R-factors R are based 
 on F, with F set to zero for negative F^2^. The threshold expression of 
 F^2^ > 2sigma(F^2^) is used only for calculating R-factors(gt) etc. and is 
 not relevant to the choice of reflections for refinement.  R-factors based 
 on F^2^ are statistically about twice as large as those based on F, and R- 
 factors based on ALL data will be even larger. 
; 
  
_refine_ls_structure_factor_coef  Fsqd 
_refine_ls_matrix_type            full 
_refine_ls_weighting_scheme       calc 
_refine_ls_weighting_details 
 'calc w=1/[\s^2^(Fo^2^)+(0.0536P)^2^+3.8848P] where P=(Fo^2^+2Fc^2^)/3' 
_atom_sites_solution_primary      direct 
_atom_sites_solution_secondary    difmap 
_atom_sites_solution_hydrogens    geom 
_refine_ls_hydrogen_treatment     constr 
_refine_ls_extinction_method      none 
_refine_ls_extinction_coef        ? 
_refine_ls_number_reflns          6446 
_refine_ls_number_parameters      439 
_refine_ls_number_restraints      0 
_refine_ls_R_factor_all           0.0575 
_refine_ls_R_factor_gt            0.0386 
_refine_ls_wR_factor_ref          0.1040 
_refine_ls_wR_factor_gt           0.0935 
_refine_ls_goodness_of_fit_ref    1.047 
_refine_ls_restrained_S_all       1.047 
_refine_ls_shift/su_max           0.001 
_refine_ls_shift/su_mean          0.000 
  
loop_ 
 _atom_site_label 
 _atom_site_type_symbol 
 _atom_site_fract_x 
 _atom_site_fract_y 
 _atom_site_fract_z 
 _atom_site_U_iso_or_equiv 
 _atom_site_adp_type 
 _atom_site_occupancy 
 _atom_site_symmetry_multiplicity 
 _atom_site_calc_flag 
 _atom_site_refinement_flags 
 _atom_site_disorder_assembly 
 _atom_site_disorder_group 
Rh1 Rh 0.549985(15) 0.75765(2) 0.188667(14) 0.02823(10) Uani 1 1 d . . . 
Cl1 Cl 0.57505(5) 0.93505(8) 0.25635(5) 0.0336(2) Uani 1 1 d . . . 
P1 P 0.64400(5) 0.46848(8) 0.51310(5) 0.0239(2) Uani 1 1 d . . . 
O1 O 0.65416(12) 0.5540(2) 0.44965(12) 0.0296(5) Uani 1 1 d . . . 
O2 O 0.59647(12) 0.5178(2) 0.55475(12) 0.0274(5) Uani 1 1 d . . . 
N1 N 0.61263(14) 0.6432(2) 0.33550(14) 0.0245(6) Uani 1 1 d . . . 
N2 N 0.49334(15) 0.6233(3) 0.30523(15) 0.0290(7) Uani 1 1 d . . . 
C1 C 0.54887(18) 0.6684(3) 0.28047(18) 0.0261(7) Uani 1 1 d . . . 
C2 C 0.59561(19) 0.5852(3) 0.39111(18) 0.0281(8) Uani 1 1 d . . . 
C3 C 0.52076(19) 0.5717(3) 0.37352(19) 0.0304(8) Uani 1 1 d . . . 
H3 H 0.4927 0.5351 0.4015 0.036 Uiso 1 1 calc R . . 
C4 C 0.68923(17) 0.6690(3) 0.33637(17) 0.0238(7) Uani 1 1 d . . . 
C5 C 0.7251(2) 0.5912(3) 0.30174(19) 0.0319(8) Uani 1 1 d . . . 
C6 C 0.7976(2) 0.6183(3) 0.3014(2) 0.0343(9) Uani 1 1 d . . . 
H6 H 0.8226 0.5675 0.2768 0.041 Uiso 1 1 calc R . . 
C7 C 0.83405(19) 0.7178(3) 0.33624(19) 0.0312(8) Uani 1 1 d . . . 
C8 C 0.79797(19) 0.7889(3) 0.37348(18) 0.0293(8) Uani 1 1 d . . . 
H8 H 0.8237 0.8559 0.3988 0.035 Uiso 1 1 calc R . . 
C9 C 0.72522(18) 0.7663(3) 0.37543(17) 0.0246(7) Uani 1 1 d . . . 
C10 C 0.6895(3) 0.4771(4) 0.2676(3) 0.0550(12) Uani 1 1 d . . . 
H10A H 0.7238 0.4111 0.2865 0.082 Uiso 1 1 calc R . . 
H10B H 0.6792 0.4818 0.2148 0.082 Uiso 1 1 calc R . . 
H10C H 0.6424 0.4644 0.2793 0.082 Uiso 1 1 calc R . . 
C11 C 0.9132(2) 0.7456(4) 0.3332(2) 0.0446(10) Uani 1 1 d . . . 
H11A H 0.9463 0.6784 0.3525 0.067 Uiso 1 1 calc R . . 
H11B H 0.9321 0.8162 0.3624 0.067 Uiso 1 1 calc R . . 
H11C H 0.9120 0.7600 0.2827 0.067 Uiso 1 1 calc R . . 
C12 C 0.6894(2) 0.8406(3) 0.42099(19) 0.0358(9) Uani 1 1 d . . . 
H12A H 0.6366 0.8546 0.3943 0.054 Uiso 1 1 calc R . . 
H12B H 0.7158 0.9166 0.4319 0.054 Uiso 1 1 calc R . . 
H12C H 0.6927 0.7991 0.4664 0.054 Uiso 1 1 calc R . . 
C13 C 0.41400(19) 0.6278(4) 0.26550(19) 0.0357(9) Uani 1 1 d . . . 
C14 C 0.3759(2) 0.7351(4) 0.2629(2) 0.0407(10) Uani 1 1 d . . . 
C15 C 0.3016(2) 0.7390(4) 0.2184(2) 0.0524(12) Uani 1 1 d . . . 
H15 H 0.2746 0.8112 0.2146 0.063 Uiso 1 1 calc R . . 
C16 C 0.2665(2) 0.6436(5) 0.1804(2) 0.0582(13) Uani 1 1 d . . . 
C17 C 0.3041(3) 0.5371(5) 0.1880(2) 0.0624(14) Uani 1 1 d . . . 
H17 H 0.2787 0.4694 0.1633 0.075 Uiso 1 1 calc R . . 
C18 C 0.3796(2) 0.5261(4) 0.2315(2) 0.0492(11) Uani 1 1 d . . . 
C19 C 0.4117(2) 0.8407(4) 0.3057(3) 0.0498(11) Uani 1 1 d . . . 
H19A H 0.4472 0.8764 0.2831 0.075 Uiso 1 1 calc R . . 
H19B H 0.4385 0.8164 0.3555 0.075 Uiso 1 1 calc R . . 
H19C H 0.3729 0.8986 0.3068 0.075 Uiso 1 1 calc R . . 
C20 C 0.1860(2) 0.6520(7) 0.1301(3) 0.089(2) Uani 1 1 d . . . 
H20A H 0.1829 0.7150 0.0944 0.133 Uiso 1 1 calc R . . 
H20B H 0.1518 0.6700 0.1588 0.133 Uiso 1 1 calc R . . 
H20C H 0.1716 0.5764 0.1049 0.133 Uiso 1 1 calc R . . 
C21 C 0.4211(3) 0.4113(4) 0.2386(3) 0.0707(15) Uani 1 1 d . . . 
H21A H 0.4688 0.4237 0.2279 0.106 Uiso 1 1 calc R . . 
H21B H 0.3907 0.3537 0.2043 0.106 Uiso 1 1 calc R . . 
H21C H 0.4310 0.3812 0.2882 0.106 Uiso 1 1 calc R . . 
C23 C 0.60940(18) 0.3319(3) 0.46808(18) 0.0281(8) Uani 1 1 d . . . 
C24 C 0.6446(2) 0.2769(4) 0.4223(2) 0.0421(10) Uani 1 1 d . . . 
H24 H 0.6879 0.3119 0.4146 0.051 Uiso 1 1 calc R . . 
C25 C 0.6171(2) 0.1723(4) 0.3881(2) 0.0486(11) Uani 1 1 d . . . 
H25 H 0.6410 0.1361 0.3563 0.058 Uiso 1 1 calc R . . 
C26 C 0.5552(2) 0.1204(4) 0.3999(2) 0.0496(11) Uani 1 1 d . . . 
H26 H 0.5364 0.0478 0.3766 0.060 Uiso 1 1 calc R . . 
C27 C 0.5202(2) 0.1737(4) 0.4456(3) 0.0510(12) Uani 1 1 d . . . 
H27 H 0.4776 0.1370 0.4540 0.061 Uiso 1 1 calc R . . 
C28 C 0.54631(19) 0.2797(3) 0.4790(2) 0.0377(9) Uani 1 1 d . . . 
H28 H 0.5212 0.3169 0.5095 0.045 Uiso 1 1 calc R . . 
C29 C 0.74026(18) 0.4513(3) 0.56398(19) 0.0267(7) Uani 1 1 d . . . 
C30 C 0.7990(2) 0.4594(4) 0.5322(2) 0.0469(11) Uani 1 1 d . . . 
H30 H 0.7886 0.4772 0.4820 0.056 Uiso 1 1 calc R . . 
C31 C 0.8720(2) 0.4412(4) 0.5749(2) 0.0547(12) Uani 1 1 d . . . 
H31 H 0.9119 0.4460 0.5537 0.066 Uiso 1 1 calc R . . 
C32 C 0.8876(2) 0.4161(4) 0.6479(2) 0.0477(11) Uani 1 1 d . . . 
H32 H 0.9382 0.4061 0.6770 0.057 Uiso 1 1 calc R . . 
C33 C 0.8302(2) 0.4058(4) 0.6785(2) 0.0445(10) Uani 1 1 d . . . 
H33 H 0.8410 0.3866 0.7285 0.053 Uiso 1 1 calc R . . 
C34 C 0.7561(2) 0.4232(3) 0.6363(2) 0.0365(9) Uani 1 1 d . . . 
H34 H 0.7165 0.4157 0.6576 0.044 Uiso 1 1 calc R . . 
C35 C 0.5438(4) 0.6015(4) 0.1267(3) 0.0766(18) Uani 1 1 d . . . 
H35 H 0.5522 0.5272 0.1562 0.092 Uiso 1 1 calc R . . 
C36 C 0.4720(4) 0.6503(5) 0.1147(2) 0.0729(17) Uani 1 1 d . . . 
H36 H 0.4388 0.6038 0.1369 0.087 Uiso 1 1 calc R . . 
C37 C 0.4301(4) 0.7230(6) 0.0498(3) 0.099(2) Uani 1 1 d . . . 
H37A H 0.4063 0.6686 0.0093 0.119 Uiso 1 1 calc R . . 
H37B H 0.3893 0.7663 0.0622 0.119 Uiso 1 1 calc R . . 
C38 C 0.4774(3) 0.8109(5) 0.0243(2) 0.0714(15) Uani 1 1 d . . . 
H38A H 0.4451 0.8753 -0.0030 0.086 Uiso 1 1 calc R . . 
H38B H 0.5017 0.7713 -0.0088 0.086 Uiso 1 1 calc R . . 
C39 C 0.5368(3) 0.8621(4) 0.0885(2) 0.0457(11) Uani 1 1 d . . . 
H39 H 0.5318 0.9493 0.0949 0.055 Uiso 1 1 calc R . . 
C40 C 0.6077(3) 0.8220(4) 0.1132(2) 0.0480(11) Uani 1 1 d . . . 
H40 H 0.6456 0.8851 0.1337 0.058 Uiso 1 1 calc R . . 
C41 C 0.6394(4) 0.7149(5) 0.0848(3) 0.0759(17) Uani 1 1 d . . . 
H41A H 0.6483 0.7361 0.0381 0.091 Uiso 1 1 calc R . . 
H41B H 0.6885 0.6944 0.1196 0.091 Uiso 1 1 calc R . . 
C42 C 0.5899(4) 0.6088(5) 0.0732(3) 0.091(2) Uani 1 1 d . . . 
H42A H 0.6212 0.5367 0.0781 0.109 Uiso 1 1 calc R . . 
H42B H 0.5553 0.6107 0.0231 0.109 Uiso 1 1 calc R . . 
  
loop_ 
 _atom_site_aniso_label 
 _atom_site_aniso_U_11 
 _atom_site_aniso_U_22 
 _atom_site_aniso_U_33 
 _atom_site_aniso_U_23 
 _atom_site_aniso_U_13 
 _atom_site_aniso_U_12 
Rh1 0.03008(16) 0.02507(16) 0.02673(16) 0.00068(12) 0.00406(11) -0.00220(12) 
Cl1 0.0363(5) 0.0292(5) 0.0364(5) -0.0036(4) 0.0122(4) -0.0067(4) 
P1 0.0175(4) 0.0247(5) 0.0297(5) 0.0020(4) 0.0073(4) -0.0010(4) 
O1 0.0204(12) 0.0362(14) 0.0318(13) 0.0057(11) 0.0071(10) -0.0028(10) 
O2 0.0204(11) 0.0283(13) 0.0351(13) -0.0018(10) 0.0104(10) -0.0025(10) 
N1 0.0205(14) 0.0246(15) 0.0286(15) 0.0009(12) 0.0076(12) -0.0027(12) 
N2 0.0221(15) 0.0294(16) 0.0343(16) 0.0053(13) 0.0067(13) -0.0022(12) 
C1 0.0261(18) 0.0191(17) 0.0318(19) -0.0014(14) 0.0065(15) -0.0014(14) 
C2 0.0273(19) 0.0279(19) 0.0295(19) 0.0036(15) 0.0088(16) 0.0005(15) 
C3 0.0257(19) 0.031(2) 0.036(2) 0.0054(16) 0.0118(16) -0.0014(15) 
C4 0.0206(16) 0.0267(18) 0.0248(17) 0.0026(14) 0.0074(14) -0.0008(14) 
C5 0.037(2) 0.030(2) 0.031(2) -0.0033(16) 0.0156(17) 0.0000(16) 
C6 0.038(2) 0.034(2) 0.037(2) 0.0024(17) 0.0209(17) 0.0054(17) 
C7 0.0228(18) 0.037(2) 0.033(2) 0.0144(16) 0.0072(15) 0.0034(15) 
C8 0.0227(18) 0.0279(19) 0.0308(19) 0.0037(15) -0.0024(15) -0.0039(15) 
C9 0.0233(17) 0.0241(18) 0.0238(17) 0.0023(14) 0.0030(14) 0.0028(14) 
C10 0.060(3) 0.040(3) 0.074(3) -0.026(2) 0.032(3) -0.010(2) 
C11 0.0240(19) 0.051(3) 0.060(3) 0.020(2) 0.0143(18) 0.0054(18) 
C12 0.035(2) 0.035(2) 0.034(2) -0.0086(17) 0.0051(16) 0.0009(17) 
C13 0.0237(18) 0.047(2) 0.035(2) 0.0100(18) 0.0057(16) -0.0061(17) 
C14 0.029(2) 0.051(3) 0.044(2) 0.0199(19) 0.0139(17) 0.0071(19) 
C15 0.031(2) 0.073(3) 0.055(3) 0.028(3) 0.014(2) 0.007(2) 
C16 0.032(2) 0.095(4) 0.044(3) 0.026(3) 0.005(2) -0.001(3) 
C17 0.044(3) 0.090(4) 0.050(3) 0.002(3) 0.009(2) -0.033(3) 
C18 0.042(2) 0.053(3) 0.049(3) 0.004(2) 0.008(2) -0.011(2) 
C19 0.041(2) 0.042(2) 0.075(3) 0.009(2) 0.029(2) 0.013(2) 
C20 0.027(2) 0.176(7) 0.055(3) 0.038(4) -0.002(2) -0.013(3) 
C21 0.067(3) 0.050(3) 0.090(4) -0.016(3) 0.016(3) -0.024(3) 
C23 0.0203(17) 0.0294(19) 0.0318(19) 0.0013(15) 0.0035(15) 0.0034(15) 
C24 0.038(2) 0.043(2) 0.051(2) -0.0059(19) 0.0208(19) -0.0013(18) 
C25 0.052(3) 0.041(3) 0.056(3) -0.016(2) 0.021(2) 0.001(2) 
C26 0.040(2) 0.039(2) 0.063(3) -0.020(2) 0.004(2) -0.003(2) 
C27 0.024(2) 0.044(3) 0.082(3) -0.020(2) 0.010(2) -0.0091(18) 
C28 0.0207(18) 0.038(2) 0.053(2) -0.0107(18) 0.0087(17) -0.0023(16) 
C29 0.0203(17) 0.0241(18) 0.035(2) 0.0000(15) 0.0068(15) -0.0024(14) 
C30 0.026(2) 0.071(3) 0.045(2) 0.010(2) 0.0123(18) -0.002(2) 
C31 0.022(2) 0.084(4) 0.058(3) 0.001(2) 0.0107(19) -0.004(2) 
C32 0.0197(19) 0.059(3) 0.057(3) -0.009(2) -0.0009(19) 0.0010(18) 
C33 0.034(2) 0.058(3) 0.035(2) -0.0040(19) 0.0010(18) 0.009(2) 
C34 0.0258(19) 0.045(2) 0.040(2) -0.0014(18) 0.0108(17) 0.0028(17) 
C35 0.165(6) 0.027(2) 0.036(3) -0.005(2) 0.027(3) -0.005(3) 
C36 0.108(5) 0.060(3) 0.043(3) -0.012(2) 0.010(3) -0.050(3) 
C37 0.092(4) 0.144(6) 0.033(3) 0.011(3) -0.023(3) -0.059(4) 
C38 0.096(4) 0.063(3) 0.038(3) 0.003(2) -0.006(3) 0.002(3) 
C39 0.075(3) 0.028(2) 0.027(2) 0.0045(17) 0.005(2) 0.003(2) 
C40 0.065(3) 0.040(2) 0.044(2) 0.006(2) 0.024(2) -0.001(2) 
C41 0.105(4) 0.079(4) 0.063(3) 0.006(3) 0.053(3) 0.028(3) 
C42 0.184(7) 0.040(3) 0.060(3) 0.006(3) 0.056(4) 0.038(4) 
  
_geom_special_details 
; 
 All esds (except the esd in the dihedral angle between two l.s. planes) 
 are estimated using the full covariance matrix.  The cell esds are taken 
 into account individually in the estimation of esds in distances, angles 
 and torsion angles; correlations between esds in cell parameters are only 
 used when they are defined by crystal symmetry.  An approximate (isotropic) 
 treatment of cell esds is used for estimating esds involving l.s. planes. 
; 
  
loop_ 
 _geom_bond_atom_site_label_1 
 _geom_bond_atom_site_label_2 
 _geom_bond_distance 
 _geom_bond_site_symmetry_2 
 _geom_bond_publ_flag 
Rh1 C1 2.042(3) . ? 
Rh1 C36 2.096(4) . ? 
Rh1 C35 2.114(4) . ? 
Rh1 C40 2.174(4) . ? 
Rh1 C39 2.214(4) . ? 
Rh1 Cl1 2.3611(9) . ? 
P1 O2 1.470(2) . ? 
P1 O1 1.613(2) . ? 
P1 C29 1.783(3) . ? 
P1 C23 1.794(4) . ? 
O1 C2 1.364(4) . ? 
N1 C1 1.369(4) . ? 
N1 C2 1.371(4) . ? 
N1 C4 1.452(4) . ? 
N2 C1 1.360(4) . ? 
N2 C3 1.391(4) . ? 
N2 C13 1.451(4) . ? 
C2 C3 1.343(5) . ? 
C3 H3 0.9500 . ? 
C4 C9 1.388(5) . ? 
C4 C5 1.389(5) . ? 
C5 C6 1.387(5) . ? 
C5 C10 1.508(5) . ? 
C6 C7 1.381(5) . ? 
C6 H6 0.9500 . ? 
C7 C8 1.378(5) . ? 
C7 C11 1.526(5) . ? 
C8 C9 1.391(5) . ? 
C8 H8 0.9500 . ? 
C9 C12 1.506(5) . ? 
C10 H10A 0.9800 . ? 
C10 H10B 0.9800 . ? 
C10 H10C 0.9800 . ? 
C11 H11A 0.9800 . ? 
C11 H11B 0.9800 . ? 
C11 H11C 0.9800 . ? 
C12 H12A 0.9800 . ? 
C12 H12B 0.9800 . ? 
C12 H12C 0.9800 . ? 
C13 C18 1.382(6) . ? 
C13 C14 1.399(5) . ? 
C14 C15 1.397(6) . ? 
C14 C19 1.490(6) . ? 
C15 C16 1.358(7) . ? 
C15 H15 0.9500 . ? 
C16 C17 1.378(7) . ? 
C16 C20 1.530(6) . ? 
C17 C18 1.414(6) . ? 
C17 H17 0.9500 . ? 
C18 C21 1.496(7) . ? 
C19 H19A 0.9800 . ? 
C19 H19B 0.9800 . ? 
C19 H19C 0.9800 . ? 
C20 H20A 0.9800 . ? 
C20 H20B 0.9800 . ? 
C20 H20C 0.9800 . ? 
C21 H21A 0.9800 . ? 
C21 H21B 0.9800 . ? 
C21 H21C 0.9800 . ? 
C23 C28 1.386(5) . ? 
C23 C24 1.391(5) . ? 
C24 C25 1.376(6) . ? 
C24 H24 0.9500 . ? 
C25 C26 1.372(6) . ? 
C25 H25 0.9500 . ? 
C26 C27 1.380(6) . ? 
C26 H26 0.9500 . ? 
C27 C28 1.379(5) . ? 
C27 H27 0.9500 . ? 
C28 H28 0.9500 . ? 
C29 C34 1.374(5) . ? 
C29 C30 1.407(5) . ? 
C30 C31 1.381(5) . ? 
C30 H30 0.9500 . ? 
C31 C32 1.379(6) . ? 
C31 H31 0.9500 . ? 
C32 C33 1.370(6) . ? 
C32 H32 0.9500 . ? 
C33 C34 1.394(5) . ? 
C33 H33 0.9500 . ? 
C34 H34 0.9500 . ? 
C35 C36 1.401(8) . ? 
C35 C42 1.527(8) . ? 
C35 H35 1.0000 . ? 
C36 C37 1.507(8) . ? 
C36 H36 1.0000 . ? 
C37 C38 1.504(7) . ? 
C37 H37A 0.9900 . ? 
C37 H37B 0.9900 . ? 
C38 C39 1.511(6) . ? 
C38 H38A 0.9900 . ? 
C38 H38B 0.9900 . ? 
C39 C40 1.344(6) . ? 
C39 H39 1.0000 . ? 
C40 C41 1.518(6) . ? 
C40 H40 1.0000 . ? 
C41 C42 1.488(8) . ? 
C41 H41A 0.9900 . ? 
C41 H41B 0.9900 . ? 
C42 H42A 0.9900 . ? 
C42 H42B 0.9900 . ? 
  
loop_ 
 _geom_angle_atom_site_label_1 
 _geom_angle_atom_site_label_2 
 _geom_angle_atom_site_label_3 
 _geom_angle 
 _geom_angle_site_symmetry_1 
 _geom_angle_site_symmetry_3 
 _geom_angle_publ_flag 
C1 Rh1 C36 96.97(16) . . ? 
C1 Rh1 C35 93.70(16) . . ? 
C36 Rh1 C35 38.9(2) . . ? 
C1 Rh1 C40 151.50(15) . . ? 
C36 Rh1 C40 96.79(19) . . ? 
C35 Rh1 C40 81.72(19) . . ? 
C1 Rh1 C39 172.78(15) . . ? 
C36 Rh1 C39 80.72(17) . . ? 
C35 Rh1 C39 88.77(17) . . ? 
C40 Rh1 C39 35.65(16) . . ? 
C1 Rh1 Cl1 89.50(9) . . ? 
C36 Rh1 Cl1 148.4(2) . . ? 
C35 Rh1 Cl1 171.5(2) . . ? 
C40 Rh1 Cl1 91.72(12) . . ? 
C39 Rh1 Cl1 89.00(11) . . ? 
O2 P1 O1 114.36(13) . . ? 
O2 P1 C29 114.32(15) . . ? 
O1 P1 C29 99.08(14) . . ? 
O2 P1 C23 113.67(14) . . ? 
O1 P1 C23 104.72(15) . . ? 
C29 P1 C23 109.38(15) . . ? 
C2 O1 P1 122.5(2) . . ? 
C1 N1 C2 110.9(3) . . ? 
C1 N1 C4 126.3(3) . . ? 
C2 N1 C4 122.7(3) . . ? 
C1 N2 C3 112.6(3) . . ? 
C1 N2 C13 124.3(3) . . ? 
C3 N2 C13 123.1(3) . . ? 
N2 C1 N1 103.1(3) . . ? 
N2 C1 Rh1 133.8(2) . . ? 
N1 C1 Rh1 123.1(2) . . ? 
C3 C2 O1 134.2(3) . . ? 
C3 C2 N1 108.6(3) . . ? 
O1 C2 N1 117.2(3) . . ? 
C2 C3 N2 104.8(3) . . ? 
C2 C3 H3 127.6 . . ? 
N2 C3 H3 127.6 . . ? 
C9 C4 C5 122.5(3) . . ? 
C9 C4 N1 118.8(3) . . ? 
C5 C4 N1 118.6(3) . . ? 
C6 C5 C4 118.1(3) . . ? 
C6 C5 C10 119.4(3) . . ? 
C4 C5 C10 122.5(3) . . ? 
C7 C6 C5 121.2(3) . . ? 
C7 C6 H6 119.4 . . ? 
C5 C6 H6 119.4 . . ? 
C8 C7 C6 118.8(3) . . ? 
C8 C7 C11 121.7(3) . . ? 
C6 C7 C11 119.4(3) . . ? 
C7 C8 C9 122.4(3) . . ? 
C7 C8 H8 118.8 . . ? 
C9 C8 H8 118.8 . . ? 
C4 C9 C8 116.7(3) . . ? 
C4 C9 C12 122.1(3) . . ? 
C8 C9 C12 121.1(3) . . ? 
C5 C10 H10A 109.5 . . ? 
C5 C10 H10B 109.5 . . ? 
H10A C10 H10B 109.5 . . ? 
C5 C10 H10C 109.5 . . ? 
H10A C10 H10C 109.5 . . ? 
H10B C10 H10C 109.5 . . ? 
C7 C11 H11A 109.5 . . ? 
C7 C11 H11B 109.5 . . ? 
H11A C11 H11B 109.5 . . ? 
C7 C11 H11C 109.5 . . ? 
H11A C11 H11C 109.5 . . ? 
H11B C11 H11C 109.5 . . ? 
C9 C12 H12A 109.5 . . ? 
C9 C12 H12B 109.5 . . ? 
H12A C12 H12B 109.5 . . ? 
C9 C12 H12C 109.5 . . ? 
H12A C12 H12C 109.5 . . ? 
H12B C12 H12C 109.5 . . ? 
C18 C13 C14 122.9(3) . . ? 
C18 C13 N2 118.6(4) . . ? 
C14 C13 N2 118.5(3) . . ? 
C15 C14 C13 116.7(4) . . ? 
C15 C14 C19 121.0(4) . . ? 
C13 C14 C19 122.3(3) . . ? 
C16 C15 C14 122.6(4) . . ? 
C16 C15 H15 118.7 . . ? 
C14 C15 H15 118.7 . . ? 
C15 C16 C17 119.1(4) . . ? 
C15 C16 C20 121.3(5) . . ? 
C17 C16 C20 119.6(5) . . ? 
C16 C17 C18 121.7(5) . . ? 
C16 C17 H17 119.2 . . ? 
C18 C17 H17 119.2 . . ? 
C13 C18 C17 116.7(4) . . ? 
C13 C18 C21 121.4(4) . . ? 
C17 C18 C21 121.8(4) . . ? 
C14 C19 H19A 109.5 . . ? 
C14 C19 H19B 109.5 . . ? 
H19A C19 H19B 109.5 . . ? 
C14 C19 H19C 109.5 . . ? 
H19A C19 H19C 109.5 . . ? 
H19B C19 H19C 109.5 . . ? 
C16 C20 H20A 109.5 . . ? 
C16 C20 H20B 109.5 . . ? 
H20A C20 H20B 109.5 . . ? 
C16 C20 H20C 109.5 . . ? 
H20A C20 H20C 109.5 . . ? 
H20B C20 H20C 109.5 . . ? 
C18 C21 H21A 109.5 . . ? 
C18 C21 H21B 109.5 . . ? 
H21A C21 H21B 109.5 . . ? 
C18 C21 H21C 109.5 . . ? 
H21A C21 H21C 109.5 . . ? 
H21B C21 H21C 109.5 . . ? 
C28 C23 C24 119.1(3) . . ? 
C28 C23 P1 119.5(3) . . ? 
C24 C23 P1 121.4(3) . . ? 
C25 C24 C23 120.6(4) . . ? 
C25 C24 H24 119.7 . . ? 
C23 C24 H24 119.7 . . ? 
C26 C25 C24 120.0(4) . . ? 
C26 C25 H25 120.0 . . ? 
C24 C25 H25 120.0 . . ? 
C25 C26 C27 119.9(4) . . ? 
C25 C26 H26 120.1 . . ? 
C27 C26 H26 120.1 . . ? 
C28 C27 C26 120.6(4) . . ? 
C28 C27 H27 119.7 . . ? 
C26 C27 H27 119.7 . . ? 
C27 C28 C23 119.7(4) . . ? 
C27 C28 H28 120.1 . . ? 
C23 C28 H28 120.1 . . ? 
C34 C29 C30 119.7(3) . . ? 
C34 C29 P1 117.6(3) . . ? 
C30 C29 P1 122.6(3) . . ? 
C31 C30 C29 119.1(4) . . ? 
C31 C30 H30 120.5 . . ? 
C29 C30 H30 120.5 . . ? 
C32 C31 C30 120.9(4) . . ? 
C32 C31 H31 119.6 . . ? 
C30 C31 H31 119.6 . . ? 
C33 C32 C31 120.0(4) . . ? 
C33 C32 H32 120.0 . . ? 
C31 C32 H32 120.0 . . ? 
C32 C33 C34 120.1(4) . . ? 
C32 C33 H33 120.0 . . ? 
C34 C33 H33 120.0 . . ? 
C29 C34 C33 120.3(4) . . ? 
C29 C34 H34 119.9 . . ? 
C33 C34 H34 119.9 . . ? 
C36 C35 C42 124.5(5) . . ? 
C36 C35 Rh1 69.8(3) . . ? 
C42 C35 Rh1 112.9(4) . . ? 
C36 C35 H35 113.9 . . ? 
C42 C35 H35 113.9 . . ? 
Rh1 C35 H35 113.9 . . ? 
C35 C36 C37 126.0(5) . . ? 
C35 C36 Rh1 71.3(3) . . ? 
C37 C36 Rh1 109.5(4) . . ? 
C35 C36 H36 113.9 . . ? 
C37 C36 H36 113.9 . . ? 
Rh1 C36 H36 113.9 . . ? 
C38 C37 C36 114.9(5) . . ? 
C38 C37 H37A 108.6 . . ? 
C36 C37 H37A 108.6 . . ? 
C38 C37 H37B 108.6 . . ? 
C36 C37 H37B 108.6 . . ? 
H37A C37 H37B 107.5 . . ? 
C37 C38 C39 110.1(4) . . ? 
C37 C38 H38A 109.6 . . ? 
C39 C38 H38A 109.6 . . ? 
C37 C38 H38B 109.6 . . ? 
C39 C38 H38B 109.6 . . ? 
H38A C38 H38B 108.2 . . ? 
C40 C39 C38 124.5(4) . . ? 
C40 C39 Rh1 70.6(2) . . ? 
C38 C39 Rh1 112.1(3) . . ? 
C40 C39 H39 114.0 . . ? 
C38 C39 H39 114.0 . . ? 
Rh1 C39 H39 114.0 . . ? 
C39 C40 C41 126.0(4) . . ? 
C39 C40 Rh1 73.8(2) . . ? 
C41 C40 Rh1 107.3(3) . . ? 
C39 C40 H40 113.9 . . ? 
C41 C40 H40 113.9 . . ? 
Rh1 C40 H40 113.9 . . ? 
C42 C41 C40 113.9(5) . . ? 
C42 C41 H41A 108.8 . . ? 
C40 C41 H41A 108.8 . . ? 
C42 C41 H41B 108.8 . . ? 
C40 C41 H41B 108.8 . . ? 
H41A C41 H41B 107.7 . . ? 
C41 C42 C35 113.0(4) . . ? 
C41 C42 H42A 109.0 . . ? 
C35 C42 H42A 109.0 . . ? 
C41 C42 H42B 109.0 . . ? 
C35 C42 H42B 109.0 . . ? 
H42A C42 H42B 107.8 . . ? 
  
_diffrn_measured_fraction_theta_max    0.998 
_diffrn_reflns_theta_full              24.51 
_diffrn_measured_fraction_theta_full   0.998 
_refine_diff_density_max    0.924 
_refine_diff_density_min   -0.381 
_refine_diff_density_rms    0.075 
